# Supplementary material for: Cognitive Performance and Apathy Predict Unemployment in Huntington’s Disease Mutation Carriers
Source: Atypon-hosted journal article supplement (doi:10.1176/appi.neuropsych.17070144), 2018-01-12
Supplement: appi.neuropsych.17070144.ds001.pdf [file appi.neuropsych.17070144.ds001.pdf]

**Supplementary Table S1.** All previous professions of the unemployed participants (n=106) in the studied cohort in alphabetical order.

| <b>Physical demanding professions</b>               | <b>Non-physical demanding professions</b> |
|-----------------------------------------------------|-------------------------------------------|
| Bartender                                           | Account manager                           |
| Building maintenance man / char worker              | Administrative and / or managerial worker |
| Catering / personal services                        | Administrative officer                    |
| Cleaner                                             | Assistant psychologist                    |
| Construction worker                                 | Assistant manager                         |
| Dairy farmer                                        | Bank employee                             |
| Fisherman                                           | Bookkeeper                                |
| Foreman                                             | Career officer                            |
| General caretaker                                   | Cash desk cashier                         |
| General foreman in construction                     | Computer engineer                         |
| Hairdresser                                         | Computer programmer                       |
| Laundry pressing-machine operator                   | Data processing operator                  |
| Machinery mechanic                                  | Electronic computer operator              |
| Maid and / or related housekeeping service worker   | Engineering estimator                     |
| Medical assistant                                   | General engineer                          |
| Mental health nurse                                 | Government administrator                  |
| Milkman                                             | Graphic designer                          |
| Motor vehicle mechanic                              | Jeweller                                  |
| Nurse practitioner                                  | Laboratory technician                     |
| Physiotherapist                                     | Marketing manager                         |
| Primary education teacher                           | Medical orderly                           |
| Production worker in transport equipment            | Stenographers, typist                     |
| Production supervisor and general foreman (general) | Pharmacy technician                       |
| Shop assistant                                      | Preacher                                  |
| Steward                                             | Production planning clerk                 |
| Teacher                                             | Psychiatric social worker                 |
| Technician                                          | Receptionist                              |
| Truck driver (long-distance transport)              | Registrar birth/death/marriage            |
| Waitress                                            | Secretary                                 |
| Working proprietor (cafe, bar and snack bar)        | Social worker                             |
|                                                     | Store manager                             |
|                                                     | Technical service advisor                 |
|                                                     | Technology manager                        |
|                                                     | Traffic planner                           |
|                                                     | Trainee estate agent                      |

Professions were coded using the Enroll-HD study SNOMED coding system and categorized based on the authors' opinion.
